# Task shifting healthcare services in the post-COVID world: A scoping review

Shukanto Das <sup>1\*</sup>, Liz Grant <sup>1</sup>

<sup>1</sup> Usher Institute of Population Health Sciences and Informatics, Global Health Academy,  
Centre for Population Health Sciences, University of Edinburgh, Edinburgh, United Kingdom

\* Corresponding author

E-mail: [shukanto.das@ed.ac.uk](mailto:shukanto.das@ed.ac.uk) (SD)

## Abstract

Task shifting (TS) redistributes services from specialised to less-qualified providers. Need for TS was intensified during COVID-19 pandemic. We locate evidences of TS across all health conditions to answer: (A) What role has TS played in services delivery since the onset of the pandemic? (B) How has the pandemic impacted strategies of TS globally? We searched five databases in October 2022: Medline, CINHAL Plus, Elsevier, Global Health and Google Scholar. 35 citations were selected. Data was analysed thematically and reported as per PRSIMA-ScR. We used WHO health systems framework and emergent themes to discuss findings. TS was observed in countries of all income-levels. 63% (n=22) articles discussed what impact TS had in COVID-19 care, mental healthcare, care for HIV, sexual and reproductive health, nutrition and rheumatoid diseases. Others (n=13) highlight how pandemic altered TS strategies in mental healthcare, HIV services, hypertension and diabetes and emergency services. Studies varied in reporting TS; majority using terms “task shifting”, followed by “task sharing”, “task shifting and sharing” and “task delegation”. TS affected every block of health system. TS to non-specialists and non-healthcare staff improved services. Modifying roles through training and collaboration strengthened workforce. TS diagnostics increased access to medicines and technologies. Strategic leadership was key. Research on financing TS during pandemics is required. Stakeholders generally accepted TS. Shifting staff between programs led to unintended service incapacities. Pandemic affected strategies of TS. Training, providing care, follow-ups and consultations went digital. Virtually-delivered interventions improved outcomes. Accessibility to digital technology presented barriers. COVID-19 modified health-seeking behaviour. Patients preferred teleconsultations and online-symptom checkers.

Organisations altered operating procedures and patient-flow pathways and added precautions to protect staff. Risks of spreading COVID-19 prompted facilities to reconsider TS. TS improved outcomes by filling workforce gaps and increasing access. We recommend TS to improve services delivery during the pandemic and beyond.

## Background

Critical shortage of skilled human resources for healthcare (HRH) vulnerates health systems and services to fragmentation. Projections of global HRH deficits by 2035 range between 12.9–18 million [1,2] Changing demographics and disease patterns, burdens of non-communicable diseases and emerging infections demands a larger qualified workforce. Given the correlation of healthcare provider numbers to service access, countries must instate appropriate ratios of skilled HRH to population through workforce development.[3] Coronavirus disease (COVID-19) has impacted services worldwide and slowed progress towards sustainable development goal–3 of achieving ‘healthy lives and well-being for all’ [4,5]. Countries have diverted finances, infrastructure and HRH to care for SARS-CoV-2 cases. Although resource-constrained settings have been disproportionately impacted, the pandemic has also affected nations with richer densities of facilities and HRH [6]. Nine among ten countries report considerable disruptions in essential healthcare services; aggravating disease burdens compared to pre-COVID years [7]. For instance, prevalence of anxiety and depression increased by 25%, with young people and women hit the worst [8]. Increase in depressive disorders costed over 49 million disability-adjusted life years [9]. Mortality due to human immunodeficiency virus (HIV) infections, tuberculosis and malaria are modelled to shoot by 10%, 20% and 36% respectively over the next five years [10]. Innovating diagnosis and treatment, scaling tele-healthcare and implementing task shifting and task sharing (TS/S) can sustain services [11].

TS/S rationally reallocate services from specialised staff to workers with lesser training or qualifications [12]. Often used synonymously, TS/S have differences. Task shifting (TS)

focuses on providers assuming new roles through task delegation from one hierarchy to other. Task sharing is not territorial and allows providers to expand duties and collaborate [13–15]. Both approaches remove bottlenecks in service processes in resource-limited settings by engaging existing HRH efficiently or creating new cadres suitable to perform tasks; thereby increasing care access [13,16]. Redlegation is achieved by defining responsibilities to be shifted or shared and subjecting new cadres to competency-based trainings [16]. TS/S has been used as pragmatic responses to low HRH and acute healthcare demands. Russian Feldshers [17], French *Officiers de Santé* [18] and Chinese barefoot doctors [19] are historical examples. TS/S has been used in surgery and obstetrics [20] and anaesthesia and ophthalmic procedures [21]. Extensive studies in context of HIV in Africa, led to the World Health Organization (WHO) guidelines to adopt, invest and expand on TS/S, enable policies and facilitate implementation through services reorganisation [16].

Reviews have analysed how TS/S can benefit health systems beyond the pandemic. For example, shifting psychotherapy to trained non-specialists can increase timely access to mental healthcare (MH) [22–24]. Integrating TS into hypertension, diabetes and obstructive lung diseases management models could preserve care continuum during future pandemics [25] Task sharing family planning services with community healthcare workers (CHWs) can lessen pregnancy-related mortality and child morbidity [26]. Human papillomavirus screening and vaccine education through CHWs could help fight cervical cancer [27].

While literature on TS in individual diseases or health issues based out of one or few comparable contexts exists, to our best knowledge our review is the first to study TS as a tool in its own right and evaluate its impact on WHO health systems building blocks [28]

since the onset of the pandemic and how TS evolved under the strains of COVID-19 globally.

We undertake this scoping review to explore two questions: (A) What role has TS played in healthcare services delivery (HSD) since the onset of COVID-19 pandemic? (B) How has the pandemic impacted strategies of TS globally?

## Methodology

Scoping reviews help identify evidences and highlight gaps in a research domain [29,30]. We used the *population, concept and context* framework [31]. Our study *population* comprised of all healthcare providers, caregivers and HRH. We investigated the *concept* of TS services, including healthcare promotion, screening, diagnostics, treatment and rehabilitation, from more to less specialised HRH; across all health conditions. Our *context* was global; since the onset of COVID-19 pandemic (November 2019). Search words specific to ‘task shifting’, ‘task sharing’, ‘health services’ and ‘COVID-19’ were run across five databases in October 2022: Medline, CINHAL Plus, Elsevier, Global Health and Google Scholar. 177 citations were imported onto Covidence software [32]. Citations were included as per the population, concept and contexts discussed above. Citations in English were included. Reviews, commentaries and theses were excluded. Citations relating to task switching in cognitive science and learning were excluded. We extracted the following information from every citation: country and setting, reasons for TS, services shifted, HRH involved in TS, training and guidelines supporting TS, outcome measures of TS, stakeholder perspectives, key findings and author recommendations. We analysed extracted data thematically [34], using a deductive and inductive hybrid approach [35]. Detailed search strategy and protocol is included as supplementary material S1.

## Results

35 citations were selected in the final study (Fig 1). PRSIMA-ScR guidelines for scoping reviews [33] were followed to report findings (S2). 63% citations from our search discussed what impact TS had in HSD since the pandemic across areas of COVID-19 care (n=14), MH (n=2), HIV services (n=3), sexual and reproductive health (n=1), nutrition (n=1) and rheumatoid diseases (n=1). The other 37% articles discuss how the pandemic impacted strategies of TS in MH (n=7), HIV services (n=3), chronic illnesses, including hypertension and diabetes (n=2), alternative care modalities (n=1) and emergency medical services (n=1). Our evidences were from 25 countries. We used World Bank data[36] to find its distribution as: high-income countries (n=9), upper middle-income countries (n=5), low-and middle-income countries (n=9) and low-income countries (n=2). We used mapchart.net to visualise this distribution on a global map (Fig 2). We discovered variations in keywords and in-text terms used to articulate the phenomenon of TS from specialised to less-qualified HRH. 25 studies used the words “task shifting” (71.43%), 6 articles used “task sharing” (20.0%), 3 articles used “task shifting and sharing” (5.71%) and 1 article used “task delegation”. S3 lists the evidences of TS we found in HSD, since the pandemic. S4 lists our findings on the impact pandemic had on TS strategies. We discuss these findings in detail hereafter using the WHO health systems framework [28] and other emergent themes.

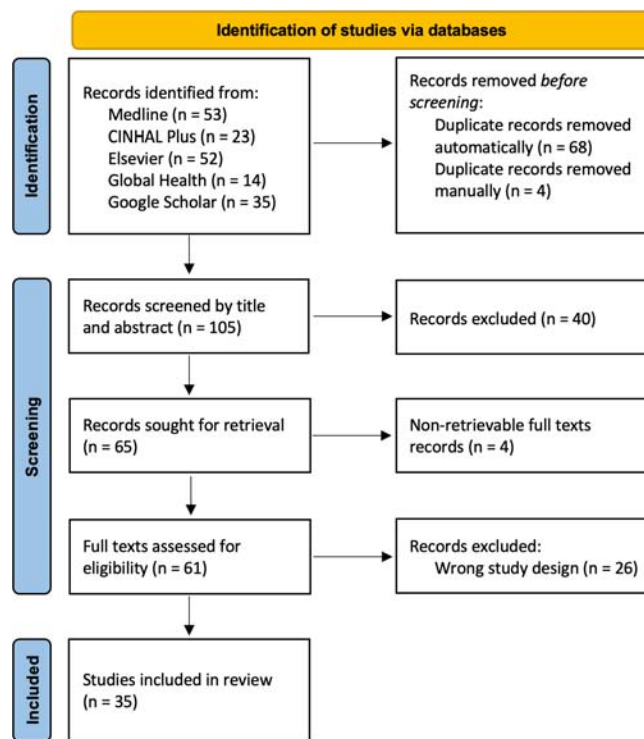

Fig 1: PRISIMA flow diagram of search and selection process of citations

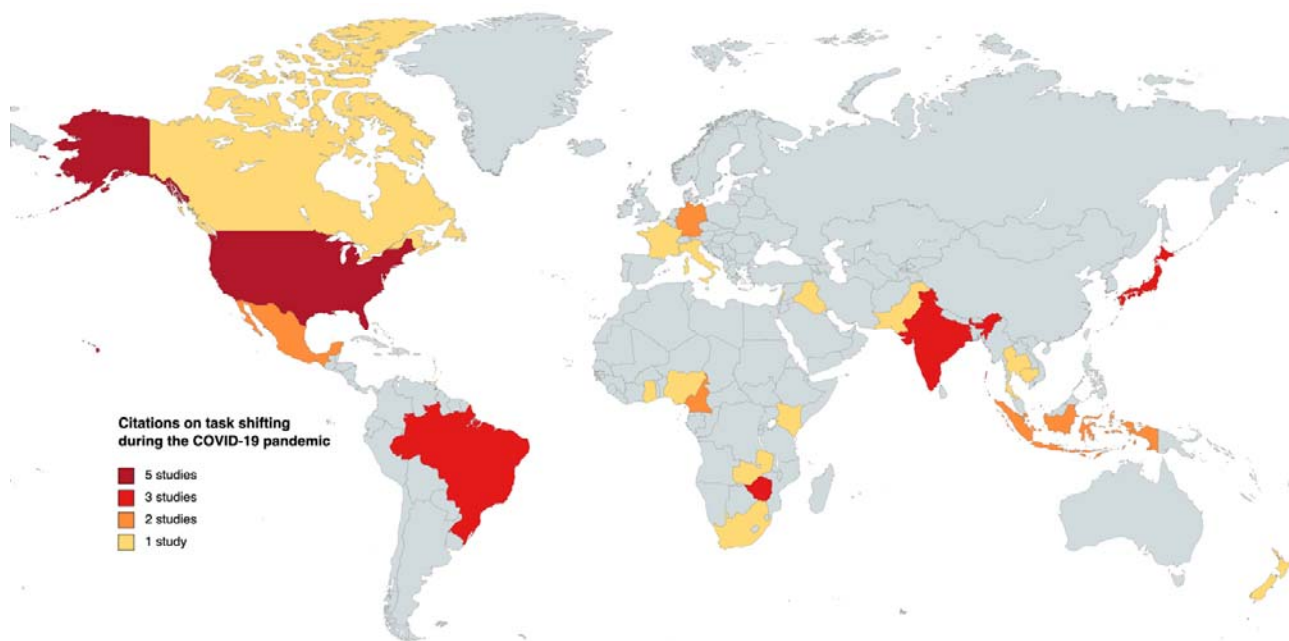

Fig 2: Global distribution of task shifting in healthcare services delivery since the onset of COVID-19 pandemic



## Discussion

Reallocation of HRH and other resources towards pandemic response strengthened COVID-19 care, but impacted other HSD [37]. Our analyses of how TS was engaged in HSD and how the pandemic in-turn affected strategies of TS, is presented under the following two sections.

### (A) Role of TS in HSD since the pandemic

As early as in March 2020, the WHO recommended use of TS/S during the pandemic [38] In this section, we use the WHO health systems framework [28] to discuss how TS impacted its six interconnected building blocks; progress in each being necessary for achieving improved healthcare access, coverage, quality, safety and social and financial risk protection [39].

#### Service delivery

This unit entails to safe effective interventions offered to those in need when required, while minimising wastages [40]. With increasing SARS-CoV-2 cases, Governments prioritised epidemiological surveys for infections. Case study by Chidavaenzi *et al* [41] on a community-wide rapid antigen-based serial screening program for tribe members at detention centres and casinos in San Carlos Reservation demonstrated that TS testing to trained non-clinical staff catalysed reduction in infection transmission. Non-clinical staff from local health departments and staff at detention centres and casinos were upskilled in sample collection, reporting, confidentiality and administration. They performed 3,834 tests among 716 people over 28 days, whereby only one person turned positive. Although community immunity through previous infections, vaccinations and social distancing may have reduced

cases, TS serial testing to non-clinical staff certainly lowered transmission [41]. Success of this program demonstrated that trained non-healthcare staff can aid in community screening programs.

COVID-19 widened MH needs and service gaps. Ortega *et al* [42] described Mexican non-profit Compañeros En Salud and the Chiapas health ministry building MH capacity through TS and skilling of non-specialist providers. Primary care physicians, CHW and non-clinical staff were trained in psychological first aid, referrals and self-care and were given pocket guides to extend psychosocial support to community members. With increasing SARS-CoV-2 cases, physicians and nurses from respiratory clinics were also skilled in psychosocial care and rehabilitation. CHW were trained in contact tracing and their home-visit questionnaires evaluated anxiety and suicidal thoughts. Furthermore, they provided MH to patients grieving and in need of palliative MH due to COVID-19. Depending on severity, providers referred to higher care [42]. TS expanded coverage of MH during the pandemic and incorporated instruments to address pandemic-induced stressors. This approach to MH, presents potential solutions to fill gaps in low-resource settings.

## **Health workforce**

Adequate numbers of competent, compassionate and responsive HRH forms this building block [40]. During the pandemic, HRH responsibilities were moved outside their specialties to meet demands. For example, multi-country survey by Taylor *et al* [43] revealed that primary care physicians were reassigned to intensive care (USA) and final year medical students (Brazil) assisted with SARS-CoV-2 caseloads. Case study of tertiary hospital in Singapore by Davis *et al* [44] remarked that nutrition behaviour contracts for patients and

caregivers, conventionally charted by psychologists, were drawn by physicians and nurses. Study of public health nurses (PHN) in Tokyo by Honda *et al* [45] reported nurses experiencing anxiety, frustration and fatigue due to sudden increase in workloads. PHN identified tasks, including contact tracing, health monitoring, hospitalisation coordination and consultation with residents, to be shifted onto part-time PHN and other nursing and support staff to forestall organisational dysfunction [45]. Similarly, analysis of teleconsultations by PHN during the first infection wave by Yoshioka-Maeda *et al* [46] showed that conversations were majorly about prevention measures and referral pathways, which PHN need not have attended. Managers were advised to let PHN handle essential consultations and shift teleconsultations onto low-level staff and office workers by developing script-based manuals and proper training. TS freed PHN to focus on infection control and management. Role modifications, however need to be complemented by changes in staff organisation and management. Abraham *et al* [47] described central teaching hospital in Ghana changing staff roles and rosters to complement transferring medication prescribing and dispensing antiretroviral therapy (ART) at pharmacies to nurses. TS ensured continuity of ART and reduce patient waiting time at HIV clinics.

While TS refers to transfers from more to less specialised workforces, the pandemic precipitated instances where more-qualified HRH assumed roles conventionally undertaken by less-qualified HRH. Taylor *et al* [43] reported primary care physicians undertaking fieldwork to screen, test and triage patients (Singapore, Trinidad and Tobago) and increase awareness about social distancing, symptoms and quarantining (Iraq, India). Shortage of nursing staff led primary care physicians to perform nursing procedures and therapy (Italy). Raskin *et al* [48] reported that since dental clinics, dental hygienists were pulled into

community screening and telehealth services to educate community members. While countries differed on HRH utilisation strategies, TS through rational reorganisation, cross-training and collaboration provided stopgap solutions to manage COVID-19 across countries.

### **Health information systems**

Reliable timely production, analysis, dissemination and usage of health system indicators constitutes this subunit [40]. Routine clinical audit data are evidences that drive quality improvement in hospitals [49] During the pandemic, sub-standard management of medical records led to system failures in clinical auditing. Multi-hospital based South African study by Sono-Setati *et al* [50] recommended TS routine clinical data collection and audit reporting from clinical staff, particularly from emergency healthcare providers to other HRH, to reinforce care and coordination. This will help reduce mortality, morbidity, stressors and burn outs. PHN at Japanese public health centers shifted teleconsultations onto office staff as discussed previously [46] Yoshioka-Maeda [51] reported PHN developing web-based data systems to exchange COVID-19 patient information and shift hospital coordination and clerical tasks to office staff, and inventory management, including management of personal protective to external companies. TS through web-based systems saved nursing time, decreased workloads and improved efficiency in allocating supplies.

### **Access to essential medicines and technologies**

This unit entails to cost-effective use of high-quality products, including medicines, vaccines and other technologies [40]. Patent access to diagnostic tools was vital as SARS-CoV-2 cases increased. Centralised testing facilities, limited HRH and poor logistics added to

Zimbabwean struggles in meeting demands, as per Gudza-Mugabe *et al* [52]. To increase access, build testing capacity and reduce reporting time, Zimbabwe followed WHO guidance of September 2021 [53] of TS antigen-based diagnostics onto laboratory technicians. Technicians were upskilled in testing and machines were upgraded with COVID-specific software. Decentralising testing from one to over thousand centres through TS, increased testing availability and uptake, shortened report turnaround time to under a day and curtailed staff burnouts [52].

## **Financing**

Subunit on financing encompasses mechanisms to fund healthcare and protect users from catastrophic expenditures [40]. Our search did not report economic evaluations of TS since the pandemic. TS saving costs for low-and middle-income countries, particularly in ART, is discussed elsewhere [54,55]. However, we found a study by Omam *et al* [56] discussing the success of Cameroonian differentiated service delivery model in decentralising ART to the community. Mobile HIV units were established through this model and testing, counselling, ART initiation and refilling and the tasks of following up and linking lost-to-follow-up patients with treatment were shifted onto non-clinical staff within primary care and community-based facilities. Although the differentiated service delivery model improved access to HIV services in hard-to-reach conflict regions, authors emphasise the need for economic evaluations of TS-based models before scaling across more conflict settings [56]

## **Leadership and governance**

This block pertains to effective stewardship in building accountable strategic policies and regulatory structures [40]. Timely preparedness plans and implementation aided pandemic management. Case study by Köppen *et al* [57] on German Federal and State policies on TS reported that while Federal policies recommended TS, TS was not incorporated by states. Federal infection control law authorised TS from doctors to paramedics, considering they held competencies, were not handling serious patients and performed documentation. However, it did not list these tasks or competencies. Only state policies of Saxony-Anhalt supplemented information to Federal law by mentioning competencies as per treatment protocols and enabling tools for documentation [57]. Although one state contextualised Federal guidelines successfully, lack of specificity and direction led to failures in adopting TS nationwide.

Foresighted direction at all organisational levels is key. Hospitals recognised the need for TS intensive care. Helmi *et al* [58] evaluated capacities of intensive care units (ICU) in Indonesia and reported inadequacies in rooms, equipment and specialists distribution. Given these limitations, leaderships directed TS in ICU through training on rights, responsibilities, communication, coordination and insurance schemes and incentives for involved HRH.[58] Mukhsam *et al* [59] described strategies by University Malaysia Sabah, Borneo, to mitigate impact of COVID-19 within campus, with a focus on MH through TS. Strict policies on screening, usage of personal protective equipment and attendance were implemented. Dedicated teams performed surveillance, health promotion, quarantining and sanitation. Upon return, international Chinese students were screened and quarantined for two weeks. Local mandarin-speaking medical students were tasked to supervise quarantined students on online-messaging applications and provide psychosocial support, health education and

ensure they filled home-monitoring questionnaires. These measures resulted in no case importations into the campus [59]. Quick policy intervention followed by effective delegation and management helped attain zero-COVID status.

Policy makers must identify and respond to threats in order to safeguard interventions. Case study by Pry *et al* [60] on Zambian COVID-19 mitigation guidelines for HIV demonstrated that prompt policy and implementation reduced interruptions in ART delivery. The government recommended dispensing six multi-month ART to patients and TS patient communication and mobilisation onto trained lay providers. These guidelines led to greater than a four-fold increase in early collections of ART. Weekly receipt of multi-month dispensation increased from 47.9% to 73.4%, and proportion of late visits fell from 18.8% to 15.1% [60]. Policy based on TS by lay providers improved ART uptake during the pandemic.

### **Unintended consequences of TS**

Alongside positive systemic impacts, TS produced certain consequences. Interviews of district managers and HRH in Islamabad by Zafar *et al* [61] reported staff undergoing reorganisation to meet acute needs of the pandemic. Government-employed lady health workers and dengue outreach workers were trained on surveillance and communication. These CHW were deployed into the community to identify SARS-CoV-2 cases and bring patients to testing. TS contact tracing to CHW however, caused them to abandon their commitments with other services, including maternal health and immunisation programs, and the sudden vacuum of HRH and service incapacity, caused these to suffer.

Faria de Moura Villela *et al* [62] assessed pandemic's impact on Brazilian HRH and reported that three-quarters of their doctors, nurses and hospital staff experienced structural changes and role-shifts. COVID-19 wards, ICU and emergency departments witnessed highest TS/S. While this assisted in managing SARS-CoV-2 cases, role changes and corresponding salary cuts coincided with elevated anxiety and depression among staff. Pandemic changed doctor-patient relationships and nature of practice teams. Eggleton *et al* [63] reported receptionists at General Practitioners (GP) in New Zealand being upskilled in telephone triaging and routing patients to consultations, nursing care or other facilities. Nurses and receptionist teams ran separate respiratory units where they triaged patients with possible symptoms to prevent transmission. These were seen by GP separately. While TS improved outputs and freed GP to attend more patients, managing different patient streams added to workloads of nurses and receptions, necessitating support staff hires.

### **Acceptability of TS**

Providers show resistance to new cadres taking on tasks. Consulting with stakeholders to help them appreciate rationale behind TS/S can motivate HRH to accept task redelegations [64,65]. Interviews by Jacobi *et al* [66] illustrated how success in contraceptives and medicines dispensing by CHW increased access to family planning services across humanitarian–development nexus and led stakeholders view TS necessary during workforce crunch. Likewise, Kuhlmann *et al* [67] describe how rheumatologist shortage in Germany led care for rheumatoid arthritis and other musculoskeletal disorders shift onto GP and rheumatology specialist assistants. Interestingly, rheumatologists found TS onto rheumatology specialist assistant more useful, compared to delegating onto GP. Exacerbated workforce shortages primed stakeholders towards TS; showcasing feasibility



and increasing acceptability. Institutionalising TS can further service access beyond the pandemic.

Medical students contribute to bridging care-provision gaps. While their engagement in pandemic response has varied across nations [68], their clinical involvement to fill HRH shortages has been recommended [69]. Surveys by Mohammed *et al* [70] across teaching hospitals in Nigeria assessed student knowledge and provider-willingness for COVID care. 90% students expressed willingness to assist but remarked fears of infections and parental disapproval. Medical students are regarded as healthcare experts by their communities [70]. TS care onto them, complemented with suitable training, can be an effective acceptable approach to increase service capacity.

## **(B) Role of COVID-19 on strategies of TS**

Next, we review how the pandemic impacted implementation strategies and processes used in TS. Our analysis informed on two sub-themes:

### **Digital technology enabled capacity building**

Through capacity building, organisations address healthcare needs by developing services, infrastructure, HRH and supporting structures [71]. COVID-based containment caused interventions cease routine activities and rapidly adopt new delivery models. SUMMIT trials by Singla *et al* [72] is TS behavioural activation for perinatal depression and anxiety from psychologists, psychiatrists and social workers onto nurses and midwives. Lockdowns in USA and Canada caused training and supervision of providers, follow-ups and data collection to

migrate onto patient-centred virtual systems. PROACTIVE by Scazufca *et al* [73] examined effectiveness of psychoeducation-based support to older adults as delivered by trained CHW with no higher education or formal training in MH. Lockdowns in Brazil caused therapy to move onto telephones. Trial found 62.5% participants recover from depression, compared to 44% recovery in participants receiving usual care. Jordans *et al* [74] described that compared to training as usual, online-delivered competency-driven training improved facilitator ability in offering psychological treatment to distressed adolescents in Lebanon by 18% without increasing training duration. These trials underscore the potential telemedicine-supported community MH interventions have in improving service quality and access.

Two Indian studies on substance use and addiction demonstrate how digital training and monitoring improved MH screening and provider knowledge, attitude and practice. Nirisha *et al* [75] compared performance of accredited social health activists (ASHA) receiving in-classroom training, with ASHA receiving additional virtual training; latter actualised by COVID-19. Virtually trained ASHA identified significantly higher number cases of alcoholism (83%;  $p \leq 0.00$ ). Their knowledge, attitude and practice scores improved more compared with in-classroom trained ASHA. In another study by Philip *et al* [76], primary care physicians were virtually trained and monitored by specialists. Post training, their knowledge scores improved by 37%. 80.7% and 47.7% trainees expressed confidence in identifying mental health issues in patients and caregivers respectively. 60.5% trainees felt confident in prescribing and managing patients, 64.9% in providing deaddiction services and 52.6% successfully identified when to refer. These cases show potential of scaling online-based MH build capacity at primary care level. Remote training offers sustainable strategies

by improving time efficiency and reducing SARS-CoV-2 infection risks, travel costs and carbon emissions.[77,78] Accessibility and affordability of digital technology are limiting factors.

Friendship Bench, which shifts screening and psychological support for common mental disorders to trained grandmothers, switched to digital applications during lockdowns. Dambi *et al* [79] piloted chat-based application Inuka, and discovered its implementation in Zimbabwe as feasible and acceptable. Depression and anxiety of users declined and quality of life improved. Kamvura *et al* [80] further integrated Friendship Bench with screening for comorbid conditions, diabetes and hypertension; maximising on TS using a theory of change approach to reduce tensions between new and existing providers [65]. Digital platforms can catalyse TS in MH and non-communicable disease care. But connectivity, application instability, expensive mobile data and power outage can limit scaling up [79].

Same-day ART initiation to patients diagnosed with HIV increases ART uptake, viral load suppression and care retention [81]. Lujintanon *et al* [82] are decentralising ART initiation to trained lay providers in Bangkok. Due to COVID, monitoring and physician consultations are being conducted virtually. Lessons from this TS-based trial will help overcome geographical and HRH barriers [82].

COVID-19 changed how healthcare was sought, delivered and regulated online. Telehealth utilisation increased 38 times and investments, tripled; fuelling innovation to improve access and affordability [83]. French survey by Oikonomidi *et al* [84] gauged perceptions of ideal post-pandemic balance between traditional and alternative modalities, such as

teleconsultations, remote monitoring and symptom checking, shifted from physicians onto applications. 22% patients with chronic illnesses preferred online symptom-checkers instead of contacting physicians when new symptoms appeared. Respondents considered TS symptom checking to online platforms as appropriate pre-consultation tools. These were found inappropriate for patients with anxiety, heterogeneous symptoms or symptoms only physicians could diagnose. Patients expressed that TS pre-consultations to applications need accreditation to quality control authorities and supervision by physicians [84].

### **Modifications in standard operating procedures**

HRH shortage and reduced financial support [85] limit ART and pre-exposure prophylaxis (PrEP) delivery in Africa. Coulaud *et al* [86] reported district-level centres in Cameroon TS routine ART prescription and administration to drive better outcomes of ART uptake. In Kenya, one-stop shop (OSS) models improved PrEP delivery, uptake and continuation. Roche *et al* [87] described how relocating client files, equipment and drugs to OSS, and TS PrEP dispensing to lower cadres reduced provider movement and waiting times. However, social distancing necessitated testing points closest to OSS be shut. Clinics transformed OSS into isolation centres and moved OSS operations to community clinics farther away. OSS reorganisation meant HRH and patients travelled between centres; wasting time and productivity [87].

Organisations modified standard operating procedures to protect HRH through the pandemic. Compañeros En Salud trains non-specialists in MH as discussed previously [42]. They extended their scope to support pandemic-based stress and anxiety. As per Rodriguez-Cuevas *et al* [88], providers undertook regular patient-home visits outdoors and while

visiting suspected cases, donned N95 or KN95 masks, face shields, isolation gowns and gloves.

Neonatal ICU in Cambodia shift incubator-side tube feeding and bag-and-mask resuscitation onto fathers and grandmothers. Iwamoto *et al* [89] report how risks of family transmitting SARS-CoV-2 to patients and staff, necessitated additional thermal scanning, sanitation and a second line of screening through symptom-based questionnaires and contact tracing. Authors further reported facilities seeking to hire additional nurses and train them to reduce dependence on task sharing with family caregivers [89]. This, however, would reverse progress made with TS.

### **Limitations and implications of future research**

We evidenced that TS from specialised to less-qualified HRH increased efficiency of HSD through the pandemic. However, this was synthesised from published literature originating from a finite set of nations, which did not include many low-income countries. Several of our citations provided inadequate information on which tasks were transferred or which HRH were involved. Research evaluating how guidelines for TS are framed, implemented and feedbacked into by HRH involved, particularly during emergencies, is required. Economic evaluations of TS in light of pandemics is also needed.

### **Conclusions**

Our review discovered TS occurring through the pandemic in countries of all income-levels across areas of healthcare, including COVID-19 care, MH, HIV services and others. TS was

necessitated due to acute healthcare demands, HRH shortages and incapacities caused by the pandemic. Multiple terminologies were used to refer to TS. TS affected every building block of health system. TS demonstrated that non-specialists and non-healthcare HRH reinforce community-based programs and offer sustainable solutions to fill workforce gaps. Modifying HRH roles, building reliable information systems, training and corporation strengthened workforces and expanded coverage and access. Strategic leadership at all levels was key in sustaining services through TS. Stakeholders accepted TS, given magnified demands and workforce crunch. TS HRH from one healthcare vertical to the other however, unintentionally led to service incapacities in donor programs. Through suitable training and monitoring, TS can improve HSD during and beyond the pandemic.

The pandemic affected mechanisms of TS considerably. Interventions delivered by non-specialists migrated onto patient-centered digital platforms. Decentralisation of HSD was supported through specialist consultations virtually. These transitions improved outcomes, particularly at primary care level. Remotely delivered interventions introduced safe time- and cost-effective solutions to HSD, but accessibility to digital technology presented challenges. COVID-19 altered health-seeking behavior of patients, who now prefer teleconsultations and online-symptom checkers. Quality assurance and supervision by experts can help increase faith in these aides. Standard operating procedures of healthcare facilities and programs changed, and service points and patient-flow pathways underwent reorganisation. Organisations added precautionary measures to protect staff. Risks of infection spread due to sharing tasks with external caregivers however, prompted facilities to consider hiring additional staff. This movement was counterproductive to TS.

## Author Contributions

Both authors contributed to the conceptualisation of the study. LG advised on the approach and methodology. SD developed the search protocol, analysed the data and drafted the manuscript. LG reviewed the data analysis and the manuscript. Authors received no specific funding for this work. Authors declare no conflict of interest.

## References

1. Campbell J, Dussault G, Buchan J, Pozo-Martin F, Guerra Arias M, Leone C, et al. A universal truth: No health without a workforce. World Health Organization. 2013. [cited 21 Dec 2022]. Available: [https://www.who.int/publications/m/item/hrh\\_universal\\_truth](https://www.who.int/publications/m/item/hrh_universal_truth)
2. Limb M. World will lack 18 million health workers by 2030 without adequate investment, warns UN. BMJ. 2016. [cited 21 Dec 2022]. doi:10.1136/bmj.i5169
3. World Health Organization. Working together for Health: World Health Report 2006. World Health Organization. Geneva; 2006. [cited 21 Dec 2022]. Available: <https://apps.who.int/iris/handle/10665/43432>
4. United Nations. Sustainable Development Goals . 2022 [cited 22 Dec 2022]. Available: <https://www.un.org/sustainabledevelopment/health/>
5. Khetrpal S, Bhatia R. Impact of COVID-19 pandemic on health system & Sustainable Development Goal 3. Indian Journal of Medical Research. 2020;151. [cited 24 Dec 2022]. doi:10.4103/ijmr.IJMR\_1920\_20

6. Núñez A, Sreeganga SD, Ramaprasad A. Access to healthcare during COVID-19. *Int J Environ Res Public Health*. 2021;18. [cited 22 Dec 2022].  
doi:10.3390/ijerph18062980
7. World Health Organization. Pulse survey on continuity of essential health services during the COVID-19 pandemic. Interim report COVID-19 Essential Health Services. 2020 Aug. [cited 22 Dec 2022]. Available:  
[https://www.who.int/publications/i/item/WHO-2019-nCoV-EHS\\_continuity-survey-2020.1](https://www.who.int/publications/i/item/WHO-2019-nCoV-EHS_continuity-survey-2020.1)
8. World Health Organization. COVID-19 pandemic triggers 25% increase in prevalence of anxiety and depression worldwide. 2 Mar 2022. Available:  
<https://www.who.int/news/item/02-03-2022-covid-19-pandemic-triggers-25-increase-in-prevalence-of-anxiety-and-depression-worldwide>. Accessed 23 Dec 2022.
9. Santomauro DF, Mantilla Herrera AM, Shadid J, Zheng P, Ashbaugh C, Pigott DM, et al. Global prevalence and burden of depressive and anxiety disorders in 204 countries and territories in 2020 due to the COVID-19 pandemic. *The Lancet*. 2021;398. [cited 23 Dec 2022]. doi:10.1016/S0140-6736(21)02143-7
10. Hogan AB, Jewell BL, Sherrard-Smith E, Vesga JF, Watson OJ, Whittaker C, et al. Potential impact of the COVID-19 pandemic on HIV, tuberculosis, and malaria in low-income and middle-income countries: a modelling study. *Lancet Glob Health*. 2020;8. [cited 23 Dec 2022]. doi:10.1016/S2214-109X(20)30288-6
11. Lickness J, Bachanas P, Tohme R, Russell A, Craig A, Hakim A. COVID-19 mitigation measures to maintain access to essential health services: new



- opportunities with long-term benefits. Pan African Medical Journal. 2021;40. [cited 23 Dec 2022]. doi:10.11604/pamj.2021.40.254.31264
12. Orkin AM, Rao S, Venugopal J, Kithulegoda N, Wegier P, Ritchie SD, et al. Conceptual framework for task shifting and task sharing: an international Delphi study. Hum Resour Health. 2021;19. [cited 24 Dec 2022]. doi:10.1186/s12960-021-00605-z
  13. Centre for Disease Control and Prevention. Sharing and Shifting Tasks to Maintain Essential Healthcare During COVID-19 in Low Resource, non-US settings. In: National Center for Immunization and Respiratory Diseases (NCIRD), Division of Viral Diseases [Internet]. 17 Jun 2022 [cited 25 Dec 2022]. Available: <https://www.cdc.gov/coronavirus/2019-ncov/global-covid-19/task-sharing.html>
  14. Lunsford S, Broughton E, Fatta K. Task Shifting/Sharing for HIV Services in 26 PEPFAR-supported Countries: A Qualitative Assessment - Research and Evaluation Report. 2019. [cited 24 Dec 2022]. Available: [https://pdf.usaid.gov/pdf\\_docs/PA00WGCS.pdf](https://pdf.usaid.gov/pdf_docs/PA00WGCS.pdf)
  15. Tsui S, Denison JA, Kennedy CE, Chang LW, Koole O, Torpey K, et al. Identifying models of HIV care and treatment service delivery in Tanzania, Uganda, and Zambia using cluster analysis and Delphi survey. BMC Health Serv Res. 2017;17. [cited 24 Dec 2022]. doi:10.1186/s12913-017-2772-4
  16. World Health Organization. Task Shifting: Global Recommendations and Guidelines. World Health Organization. 2008. [cited 24 Dec 2022]. doi:10.1080/17441692.2011.552067

17. Sidel VW. Feldshers and Feldsherism. *New England Journal of Medicine*. 1968;278. [cited 20 Dec 2022]. doi:10.1056/nejm196804252781705
18. Heller R. Ofaficiers de santé: The second-class doctors of nineteenth-century france. *Med Hist*. 1978;22. [cited 23 Dec 2022]. doi:10.1017/S0025727300031732
19. Gross M. Between Party, People, and Profession: The Many Faces of the “Doctor” during the Cultural Revolution. *Medical History*. 2018. [cited 22 Dec 2022]. doi:10.1017/mdh.2018.23
20. Vaz F, Bergström S, Vaz MDL, Langa J, Bugalho A. Training medical assistants for surgery. *Bull World Health Organ*. 1999. [cited 23 Dec 2022]. Available: <https://apps.who.int/iris/handle/10665/267901>
21. Mullan F, Frehywot S. Non-physician clinicians in 47 sub-Saharan African countries. *Lancet*. 2007;370. [cited 23 Dec 2022]. doi:10.1016/S0140-6736(07)60785-5
22. Kola L, Kohrt BA, Hanlon C, Naslund JA, Sikander S, Balaji M, et al. COVID-19 mental health impact and responses in low-income and middle-income countries: reimagining global mental health. *The Lancet Psychiatry*. 2021. [cited 23 Dec 2022]. doi:10.1016/S2215-0366(21)00025-0
23. Javed A, Lee C, Zakaria H, Buenaventura RD, Cetkovich-Bakmas M, Duailibi K, et al. Reducing the stigma of mental health disorders with a focus on low- and middle-income countries. *Asian Journal of Psychiatry*. 2021. [cited 24 Dec 2022]. doi:10.1016/j.ajp.2021.102601

24. Lange KW. Coronavirus disease 2019 (COVID-19) and global mental health. Global Health Journal. 2021. [cited 24 Dec 2022]. doi:10.1016/j.glohj.2021.02.004
25. Mobula LM, Heller DJ, Commodore-Mensah Y, Walker Harris V, Cooper LA. Protecting the vulnerable during COVID-19: Treating and preventing chronic disease disparities. Gates Open Res. 2020;4. [cited 24 Dec 2022]. doi:10.12688/gatesopenres.13181.1
26. Johnson SA, Kaggwa MN, Lathrop EVA. How It Started, and How It's Going: Global Family Planning Programs. Clin Obstet Gynecol. 2021;64. [cited 25 Dec 2022].doi:10.1097/GRF.0000000000000625
27. Steben M, Norris T, Rosberger Z. COVID-19 Won't Be the Last (Or Worst) Pandemic: It's Time to Build Resilience Into Our Cervical Cancer Elimination Goals. Journal of Obstetrics and Gynaecology Canada. 2020. [cited 25 Dec 2022]. doi:10.1016/j.jogc.2020.08.006
28. World Health Organization. Everybody's business: strengthening health systems to improve health outcomes: WHO's framework for action. Production. 2007 Aug. [cited 25 Dec 2022]. Available: <https://apps.who.int/iris/handle/10665/43918>
29. Mays N, Roberts E, Popay J. Synthesising research evidence. Studying the organisation and delivery of health services: Research methods. 2001. [cited 26 Dec 2022].doi:10.4324/9780203481981
30. Arksey H, O'Malley L. Scoping studies: Towards a methodological framework. International Journal of Social Research Methodology: Theory and Practice. 2005;8. [cited 26 Dec 2022].doi:10.1080/1364557032000119616

31. Khalil H, Tricco AC. Differentiating between mapping reviews and scoping reviews in the evidence synthesis ecosystem. *J Clin Epidemiol*. 2022 [cited 27 Dec 2022]. doi:10.1016/j.jclinepi.2022.05.012
32. Veritas Health Innovation. Covidence systematic review software. Melbourne Australia. Melbourne, Australia; Available: [www.covidence.org](http://www.covidence.org).
33. Tricco AC, Lillie E, Zarin W, O'Brien KK, Colquhoun H, Levac D, et al. PRISMA extension for scoping reviews (PRISMA-ScR): Checklist and explanation. *Annals of Internal Medicine*. 2018. [cited 30 Dec 2022]. doi:10.7326/M18-0850
34. Braun V, Clarke V. Using thematic analysis in psychology. *Qual Res Psychol*. 2006;3. [cited 28 Dec 2022]. doi:10.1191/1478088706qp063oa
35. Xu W, Zammit K. Applying Thematic Analysis to Education: A Hybrid Approach to Interpreting Data in Practitioner Research. *Int J Qual Methods*. 2020;19. [cited 28 Dec 2022]. doi:10.1177/1609406920918810
36. The World Bank. World Bank list of economies. In: World Bank list of economies [Internet]. 2020 [cited 29 Dec 2022]. Available: <https://datahelpdesk.worldbank.org/knowledgebase/articles/906519-world-bank-country-and-lending-groups>
37. Frank L, Concannon T, Patel K. Health Care Resource Allocation Decision-making During a Pandemic. *Health Care Resource Allocation Decisionmaking During a Pandemic*. 2020. [cited 31 Dec 2022]. doi:10.7249/rra326-1
38. Jarosińska A, Walicka A, Jarosińska D, Miecznikowska D, Cuchí P. Operational considerations for case management of COVID-19 in health facility and community. *Pediatrica i Medycyna Rodzinna*. 2020;16. [cited 30 Dec 2022].doi:10.15557/PiMR.2020.0004

39. World Health Organization. Monitoring the Building Blocks of Health Systems: a Handbook of Indicators and Their Measurement Strategies. World Health Organization. 2010. [cited 31 Dec 2022]. Available: <https://apps.who.int/iris/handle/10665/258734>
40. de SAVINGY D, TAGHREED A. Systems thinking for health systems strengthening. Autophagy. 2009. [cited 31 Dec 2022]. Available: <https://apps.who.int/iris/handle/10665/44204>
41. Chidavaenzi NZ, Agathis N, Lees Y, Stevens H, Clark J, Reede D, et al. Implementation of a COVID-19 Screening Testing Program in a Rural, Tribal Nation: Experience of the San Carlos Apache Tribe, January–February 2021. Public Health Reports. 2022;137. [cited 14 Nov 2022]. doi:10.1177/00333549211061770
42. Ortega AC, Valtierra E, Rodríguez-Cuevas FG, Aranda Z, Preciado G, Mohar S. Protecting vulnerable communities and health professionals from COVID-19 associated mental health distress: a comprehensive approach led by a public-civil partnership in rural Chiapas, Mexico. Glob Health Action. 2021;14. [cited 14 Nov 2022]. doi:10.1080/16549716.2021.1997410
43. Taylor MK, Kinder K, George J, Bazemore A, Mannie C, Phillips R, et al. Multinational primary health care experiences from the initial wave of the COVID-19 pandemic: A qualitative analysis. SSM - Qualitative Research in Health. 2022;2. [cited 14 Nov 2022]. doi:10.1016/j.ssmqr.2022.100041
44. Davis C, Ng KC, Oh JY, Baeg A, Rajasegaran K, Chew CSE. Caring for Children and Adolescents With Eating Disorders in the Current Coronavirus 19 Pandemic: A

- Singapore Perspective. *Journal of Adolescent Health*. 2020;67. [cited 15 Nov 2022]. doi:10.1016/j.jadohealth.2020.03.037
45. Honda C, Sumikawa Y, Yoshioka-Maeda K, Iwasaki-Motegi R, Yamamoto-Mitani N. Confusions and responses of managerial public health nurses during the COVID-19 pandemic in Japan. *Public Health Nurs*. 2022;39. [cited 15 Nov 2022]. doi:10.1111/phn.13011
46. Yoshioka-Maeda K, Sumikawa Y, Tanaka N, Honda C, Iwasaki-Motegi R, Yamamoto-Mitani N. Content analysis of the free covid-19 telephone consultations available during the first wave of the pandemic in japan. *Healthcare (Switzerland)*. 2021;9. [cited 14 Nov 2022]. doi:10.3390/healthcare9111593
47. Abraham SA, Berchie GO, Doe PF, Agyare E, Addo SA, Obiri-Yeboah D. Effects of COVID-19 pandemic on ART Service delivery: perspectives of healthcare workers in a Teaching Hospital in Ghana. *BMC Health Serv Res*. 2021;21. [cited 16 Nov 2022]. doi:10.1186/s12913-021-07330-2
48. Raskin SE, Diep VK, Chung-Bridges K, Heaton LJ, Frantsve-Hawley J. Dental safety net providers' experiences with service delivery during the first year of COVID-19 should inform dental pandemic preparedness. *Journal of the American Dental Association*. 2022;153. [cited 15 Nov 2022]. doi:10.1016/j.adaj.2021.11.005
49. Paton JY, Ranmal R, Dudley J. Clinical audit: Still an important tool for improving healthcare. *Arch Dis Child Educ Pract Ed*. 2015;100. [cited 15 Nov 2022]. doi:10.1136/archdischild-2013-305194

50. Sono-Setati ME, Mphekgwana PM, Mabila LN, Mbombi MO, Muthelo L, Matlala SF, et al. Health System- and Patient-Related Factors Associated with COVID-19 Mortality among Hospitalized Patients in Limpopo Province of South Africa's Public Hospitals. *Healthcare*. 2022;10: 1338. [cited 16 Nov 2022]. doi:10.3390/healthcare10071338
51. Yoshioka-Maeda K. Developing sustainable public health care systems for responding to COVID-19 in Japan. *Public Health Nurs*. 2021;38. [cited 17 Nov 2022]. doi:10.1111/phn.12861
52. Gudza-Mugabe M, Sithole K, Sisywa L, Zimuto S, Charimari LS, Chimusoro A, et al. Zimbabwe's emergency response to COVID-19: Enhancing access and accelerating COVID-19 testing as the first line of defence against the COVID-19 pandemic. *Front Public Health*. 2022 Jul. [cited 18 Nov 2022]. doi:10.3389/fpubh.2022.871567
53. WHO Guidance N. Diagnostic testing for SARS-CoV-2 Interim guidance 11 September 2020. World Health Organization (WHO). 2020;85. [cited 17 Nov 2022]. Available: <https://apps.who.int/iris/handle/10665/43918>
54. Seidman G, Atun R. Does task shifting yield cost savings and improve efficiency for health systems? A systematic review of evidence from low-income and middle-income countries. *Hum Resour Health*. 2017;15. [cited 18 Nov 2022]. doi:10.1186/s12960-017-0200-9
55. Asfaw E, Mekonnen N, Johns B, Wong W, Bekele A, Palen JGH, et al. Economic Analysis of ART Task Shifting in Limited Resource Setting Using Econometric Model: Ethiopia Case Study. *Athens Journal of Health*. 2016;3. [cited 17 Nov 2022]. doi:10.30958/ajh.3-1-3

56. Omam LA, Jarman E, Ekokobe W, Evon A, Omam EN. Mobile clinics in conflict-affected communities of North West and South West regions of Cameroon: an alternative option for differentiated delivery service for internally displaced persons during COVID-19. *Confl Health*. 2021;15. [cited 19 Nov 2022].  
doi:10.1186/s13031-021-00427-9
57. Köppen J, Hartl K, Maier CB. Health workforce response to Covid-19: What pandemic preparedness planning and action at the federal and state levels in Germany?: Germany's health workforce responses to Covid-19. *International Journal of Health Planning and Management*. 2021;36. [cited 19 Nov 2022].  
doi:10.1002/hpm.3146
58. Helmi M, Sari D, Meliala A, Trisnantoro L. What is preparedness and capacity of intensive care service in indonesia to response to covid-19? A mixed-method study. *Open Access Maced J Med Sci*. 2021;9. [cited 20 Nov 2022].  
doi:10.3889/oamjms.2021.7626
59. Mukhsam MH, Jeffree MS, Tze Ping Pang N, Syed Abdul Rahim SS, Omar A, Abdullah MS, et al. A university-wide preparedness effort in the alert phase of COVID-19 incorporating community mental health and task-shifting strategies: Experience from a bornean institute of higher learning. *American Journal of Tropical Medicine and Hygiene*. 2020;103. [cited 21 Nov 2022].  
doi:10.4269/ajtmh.20-0458
60. Pry JM, Sikombe K, Mody A, Iyer S, Mutale J, Vlahakis N, et al. Mitigating the effects of COVID-19 on HIV treatment and care in Lusaka, Zambia: A before-after cohort study using mixed effects regression. *BMJ Glob Health*. 2022;7. [cited 21 Nov 2022]. doi:10.1136/bmjgh-2021-007312



61. Zafar S, Fruchtmann CS, Bilal Khalid M, Zia Z, Khalid Khan F, Iqbal S, et al. Lessons learnt of the COVID-19 contact tracing strategy in Islamabad Capital Territory, Pakistan using systems thinking processes. *Front Public Health*. 2022;10. [cited 22 Nov 2022]. doi:10.3389/fpubh.2022.909931
62. Faria de Moura Villela E, Rodrigues da Cunha I, Nelson Siewe Fodjo J, Obimpeh M, Colebunders R, van Hees S. Impact of covid-19 on healthcare workers in brazil between august and november 2020: A cross-sectional survey. *Int J Environ Res Public Health*. 2021;18. [cited 22 Nov 2022]. doi:10.3390/ijerph18126511
63. Eggleton K, Bui N, Goodyear-Smith F. Disruption to the doctor–patient relationship in primary care: a qualitative study. *BJGP Open*. 2022; BJGPO.2022.0039. [cited 24 Nov 2022].doi:10.3399/BJGPO.2022.0039
64. World Health Organization. Joint WHO/OGAC Technical Consultation on Task Shifting Key elements of a regulatory framework in support of in-country implementation of “Task Shifting.” Geneva; 2007 Feb. [cited 23 Nov 2022]. Available: <https://www.equinetafrica.org/sites/default/files/uploads/documents/OGAhr es270307.pdf>
65. Feiring E, Lie AE. Factors perceived to influence implementation of task shifting in highly specialised healthcare: A theory-based qualitative approach. *BMC Health Serv Res*. 2018;18. [cited 26 Nov 2022]. doi:10.1186/s12913-018-3719-0
66. Jacobi L, Rich S. Covid-19’s Effects on Contraceptive Services Across the Humanitarian–Development Nexus. *Institute of Development Studies Bulletin*.

2022;53. [cited 25 Nov 2022]. Available:

<https://bulletin.ids.ac.uk/index.php/idsbo/article/view/3162/3202>

67. Kuhlmann E, Bruns L, Hoepfer K, Richter M, Witte T, Ernst D, et al. Work situation of rheumatologists and residents in times of COVID-19: Findings from a survey in Germany. *Z Rheumatol*. 2021. [cited 25 Nov 2022].  
doi:10.1007/s00393-021-01081-5
68. Guragai M, Achanta A, Gopez AYO, Niyotwambaza J, Cardoso LG, Estavillo NL, et al. Medical students' response to the covid-19 pandemic experience and recommendations from five countries. *Perspect Biol Med*. 2020;63. [cited 28 Nov 2022]. doi:10.1353/pbm.2020.0051
69. Miller DG, Pierson L, Doernberg S. The Role of Medical Students during the COVID-19 Pandemic. *Annals of Internal Medicine*. 2020. [cited 31 Nov 2022].  
doi:10.7326/M20-1281
70. Mohammed A, Mohammed A, Mohammed IU, Danimoh MA, Laima CH. Risk Perception and Willingness of Medical Students in North East Nigeria to Participate in Mitigating COVID 19 Pandemic. *J Adv Med Med Res*. 2020. [cited 31 Nov 2022]. doi:10.9734/jammr/2020/v32i730456
71. Hawe P, Noort M, King L, Jordens C. Multiplying health gains: The critical role of capacity-building within health promotion programs. *Health Policy (New York)*. 1997;39. [cited 31 Nov 2022]. doi:10.1016/S0168-8510(96)00847-0
72. Singla DR, Meltzer-Brody SE, Silver RK, Vigod SN, Kim JJ, la Porte LM, et al. Scaling Up Maternal Mental healthcare by Increasing access to Treatment (SUMMIT) through non-specialist providers and telemedicine: a study protocol

- for a non-inferiority randomized controlled trial. *Trials*. 2021;22. [cited 4 Dec 2022]. doi:10.1186/s13063-021-05075-1
73. Scazufca M, Nakamura CA, Seward N, Moreno-Agostino D, van de Ven P, Hollingworth W, et al. A task-shared, collaborative care psychosocial intervention for improving depressive symptomatology among older adults in a socioeconomically deprived area of Brazil (PROACTIVE): a pragmatic, two-arm, parallel-group, cluster-randomised controlled trial. *Lancet Healthy Longev*. 2022;3: e690–e702. [cited 6 Nov 2022]. doi:10.1016/S2666-7568(22)00194-5
74. Jordans MJD, Steen F, Koppenol-Gonzalez G v., el Masri R, Coetzee AR, Chamate S, et al. Evaluation of competency-driven training for facilitators delivering a psychological intervention for children in Lebanon: a proof-of-concept study. *Epidemiol Psychiatr Sci*. 2022;31: e48. [cited 6 Dec 2022]. doi:10.1017/S2045796022000348
75. Nirisha PL, Malathesh BC, Kulal N, Harshithaa NR, Ibrahim FA, Suhas S, et al. Impact of Technology Driven Mental Health Task-shifting for Accredited Social Health Activists (ASHAs): Results from a Randomised Controlled Trial of Two Methods of Training. *Community Ment Health J*. 2022. [cited 8 Dec 2022]. doi:10.1007/s10597-022-00996-w
76. Philip S, Patley R, Chander R, Varshney P, Dosajh AC, Vinay B, et al. A report on successful introduction of tele mental health training for primary care doctors during the COVID 19 pandemic. *Asian J Psychiatr*. 2022;68. [cited 7 Dec 2022]. doi:10.1016/j.ajp.2021.102967
77. Ørngreen R, Gnaur D, Henningsen B. Meeting online to reduce carbon emissions and to emphasise values in life and at work. *Proceedings of the*

European Conference on e-Learning, ECEL. 2019. [cited 7 Dec 2022].

doi:10.34190/EEL.19.055

78. Yin Z, Jiang X, Lin S, Liu J. The impact of online education on carbon emissions in the context of the COVID-19 pandemic – Taking Chinese universities as examples. *Appl Energy*. 2022;314. [cited 9 Dec 2022].

doi:10.1016/j.apenergy.2022.118875

79. Dambi J, Norman C, Doukani A, Potgieter S, Turner J, Musesengwa R, et al. A Digital Mental Health Intervention (Inuka) for Common Mental Health Disorders in Zimbabwean Adults in Response to the COVID-19 Pandemic: Feasibility and Acceptability Pilot Study. *JMIR Ment Health*. 2022;9: e37968.

[cited 9 Dec 2022]. doi:10.2196/37968

80. Kamvura TT, Turner J, Chiriseri E, Dambi J, Verhey R, Chibanda D. Using a theory of change to develop an integrated intervention for depression, diabetes and hypertension in Zimbabwe: lessons from the Friendship Bench project. *BMC Health Serv Res*. 2021;21. [cited 10 Dec 2022].

doi:10.1186/s12913-021-06957-5

81. Koenig SP, Dorvil N, Dévieux JG, Hedt-Gauthier BL, Riviere C, Faustin M, et al. Same-day HIV testing with initiation of antiretroviral therapy versus standard care for persons living with HIV: A randomized unblinded trial. *PLoS Med*.

2017;14. [cited 11 Dec 2022]. doi:10.1371/journal.pmed.1002357

82. Lujintanon S, Amatavete S, Thitipatarakorn S, Puthanakit T, Songtaweasin WN, Chaisalee T, et al. Key population-led community-based same-day antiretroviral therapy (CB-SDART) initiation hub in Bangkok, Thailand: a

- protocol for a hybrid type 3 implementation trial. *Implement Sci Commun.* 2022;3: 101. [cited 12 Dec 2022]. doi:10.1186/s43058-022-00352-9
83. Bestsenny O, Gilbert G, Harris A, Rost J. Telehealth: A quarter-trillion-dollar post-COVID-19 reality? *Healthcare Systems & Services.* 2021 [cited 15 Dec 2022]. Available: <https://connectwithcare.org/wp-content/uploads/2021/07/telehealth-a-quarter-trillion-dollar-post-covid-19-reality.pdf>
84. Oikonomidi T, Ravaud P, Barger D, Tran VT. Preferences for Alternative Care Modalities among French Adults with Chronic Illness. *JAMA Netw Open.* 2021;4. [cited 16 Dec 2022]. doi:10.1001/jamanetworkopen.2021.41233
85. UNAIDS. Confronting inequalities-Lessons for pandemic responses from 40 years of AIDS. *Global AIDS Update.* 2021. [cited 18 Dec 2022]. Available: [https://www.unaids.org/sites/default/files/media\\_asset/2021-global-aids-update\\_en.pdf](https://www.unaids.org/sites/default/files/media_asset/2021-global-aids-update_en.pdf)
86. Coulaud P, Sow A, Sagaon-Teyssier L, Ndiaye K, Maradan G, Laurent C, et al. Individual and healthcare supply-related HIV transmission factors in HIV-positive patients enrolled in the antiretroviral treatment access program in the Centre and Littoral regions in Cameroon (ANRS-12288 EVOLCam survey). *PLoS One.* 2022;17: e0266451. [cited 16 Dec 2022]. doi:10.1371/journal.pone.0266451
87. Roche SD, Odoyo J, Irungu E, Kwach B, Dollah A, Nyerere B, et al. A one-stop shop model for improved efficiency of pre-exposure prophylaxis delivery in public clinics in western Kenya: a mixed methods implementation science study. *J Int AIDS Soc.* 2021;24. [cited 18 Dec 2022]. doi:10.1002/jia2.25845

88. Rodriguez-Cuevas F, Valtierra-Gutiérrez E, Roblero-Castro J, Guzmán-Roblero C. Living Six Hours Away from Mental Health Specialists: Enabling Access to Psychosocial Mental Health Services through the Implementation of Problem Management plus Delivered by Community Health Workers in Rural Chiapas, Mexico. *Intervention*. 2021;19. [cited 20 Dec 2022].  
doi:10.4103/intv.intv\_28\_20
89. Iwamoto A, Tung R, Ota T, Hosokawa S, Matsui M. Challenges to neonatal care in Cambodia amid the COVID-19 pandemic. [cited 20 Dec 2022]. *Glob Health Med*. 2020;2. doi:10.35772/ghm.2020.01030

## **Supplementary information**

**S1: Protocol used to conduct literature search and data analysis**

**S2: PRISMA-ScR checklist for reporting data**

**S3: Examples of task shifting in healthcare services delivery since COVID-19 pandemic**

**S4: Examples of the impact of pandemic on task shifting strategies**
